# Supplementary material for: Construction of activated carbon-supported B3N3 doped carbon as metal-free catalyst for dehydrochlorination of 1,2-dichloroethane to produce vinyl chloride
Source: Royal Society of Chemistry journal article supplement (doi:10.1039/d0ra10037d), 2020-12-24
Supplement: d0ra10037d1.pdf [file d0ra10037d1.pdf]

# **Construction of Activated Carbons-Supported B<sub>3</sub>N<sub>3</sub> Doped Carbons as Metal-free Catalyst for Dehydrochlorination of 1,2-Dichloroethane to Produce Vinyl Chloride**

Chen Chen,<sup>†,a</sup> Zhaobing Shen,<sup>‡,§,a</sup>, Kangkang Guo,<sup>†</sup> Yaping Zhu,<sup>†</sup> Fan Wang,<sup>†</sup> Biao Jiang,<sup>‡,§,\*</sup>, and Huimin Qi.<sup>†,\*</sup>

<sup>†</sup> Key Laboratory of Specially Functional Polymeric Materials and Related Technology of Ministry of Education. School of Materials Science and Engineering, East China University of Science & Technology, Shanghai 200237, China.

<sup>‡</sup> Green Chemical Engineering Research Centre, Shanghai Advanced Research Institute, Chinese Academy of Sciences, No. 99 Haike Road, Zhangjiang Hi-Tech Park, Pudong Shanghai, P. R. China.

<sup>§</sup> Shanghai Green Chemical Engineering Research Centre, Shanghai Institute of Organic Chemistry, Chinese Academy of Sciences, No. 345 Lingling Road, Shanghai, P. R. China.

<sup>a</sup> These authors contributed equally

\*Corresponding author: Tel:+86 021 64250643 E-mail: qihm@ecust.edu.cn. (H. Qi),  
jiangb@mail.sioc.ac.cn. (B. Jiang)

The FTIR spectra was shown in Figure S1 (a), the absorption bands at 3290  $\text{cm}^{-1}$  and 2110  $\text{cm}^{-1}$  are the  $\text{C}\equiv\text{C}-\text{H}$  and  $-\text{Ph}-\text{C}\equiv\text{CH}$  stretch vibrations, respectively. The band at 2180  $\text{cm}^{-1}$  is the  $-\text{B}-\text{C}\equiv\text{C}-\text{Ph}-$  stretch vibration<sup>1</sup>. The typical absorption bands at 3430  $\text{cm}^{-1}$  and 1459  $\text{cm}^{-1}$  are assigned to the N-H and B-N stretching vibration, respectively. And an out-of-plane bending vibration at 684  $\text{cm}^{-1}$  of  $\text{B}_3\text{N}_3$  ring is also observed. The  $^1\text{H}$  NMR spectra was shown in Figure S1 (b), the aromatic and ethynyl protons appear as multiple at 7.20-7.80 and 3.11 ppm<sup>2</sup>, respectively. And the characteristic peak at 5.60 ppm was assigned to the NH- on  $\text{B}_3\text{N}_3$ .

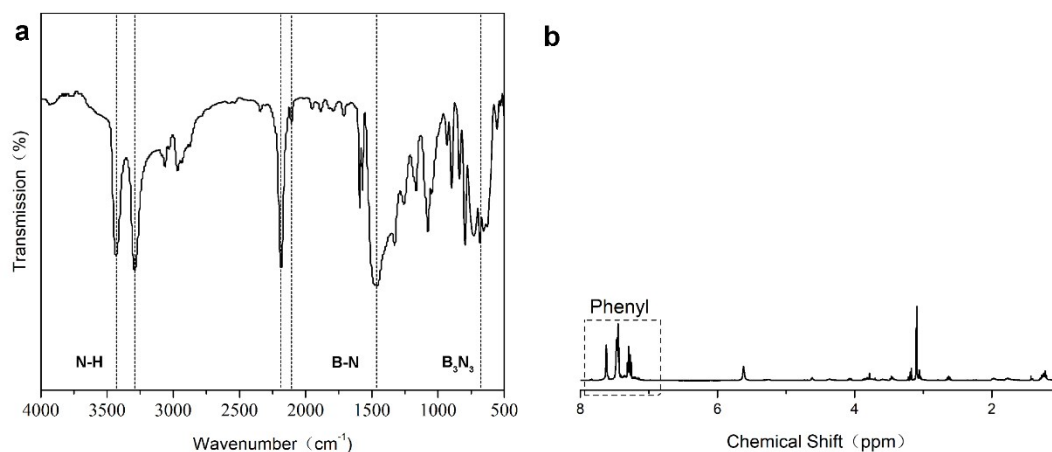

**Figure S1.** FTIR spectra (a) and  $^1\text{H}$  NMR spectra of PBSZ.

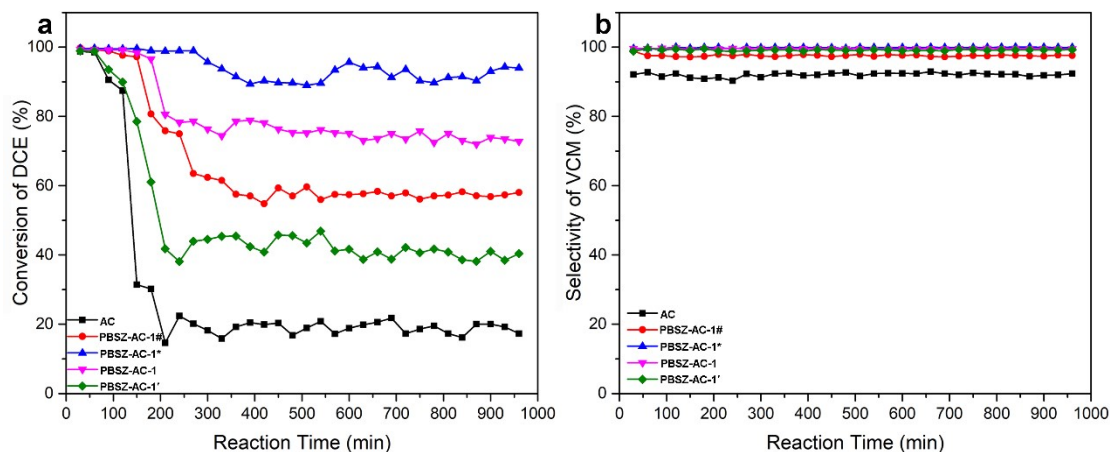

**Figure S2.** (a) the conversion of 1,2-DCE over the B, N-ACs catalysts; (b) the selectivity of VCM over the B, N-ACs catalysts. Reaction conditions: temperature=250°C, 0.1 MPa, LHSV (1,2-DCE) = 0.67  $\text{h}^{-1}$ .

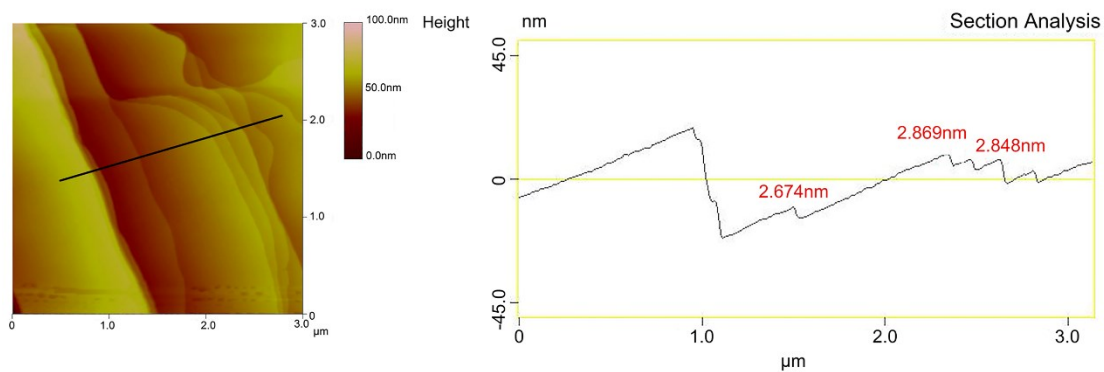

**Figure S3.** AFM images of PBSZ precursor after carbonized at 700°C.

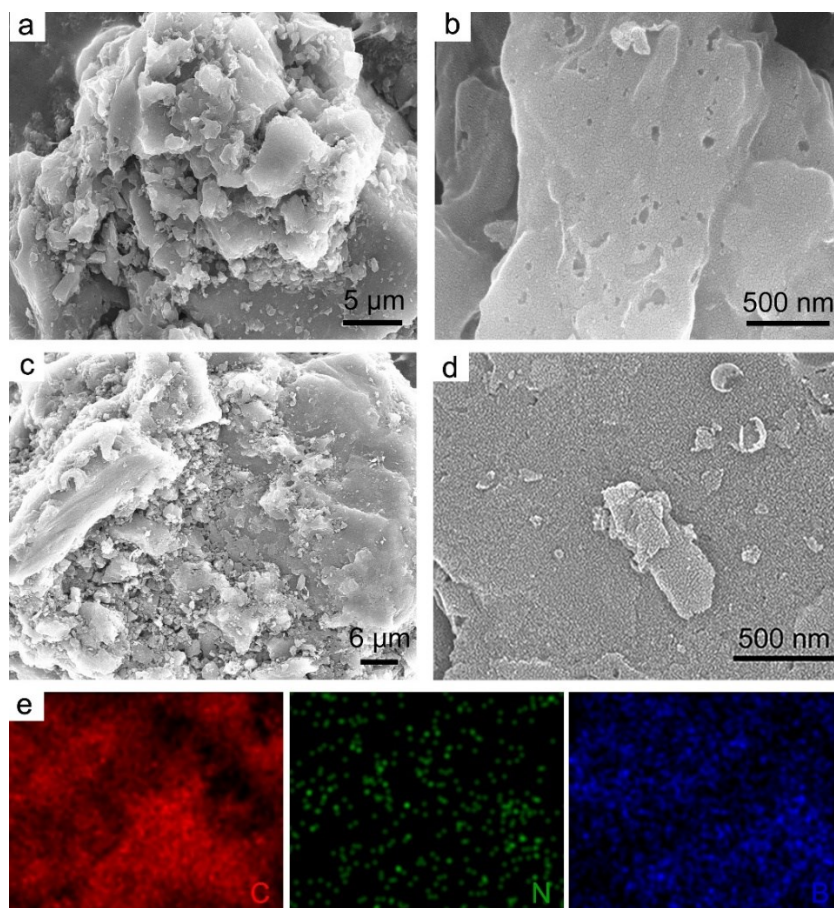

**Figure S4.** SEM micrograph of (a)(b) fresh PBSZ-AC-1 catalyst and (c)(d) used PBSZ-AC-1 catalyst; (e) elemental distribution mapping of C, N, B in fresh PBSZ-AC-1

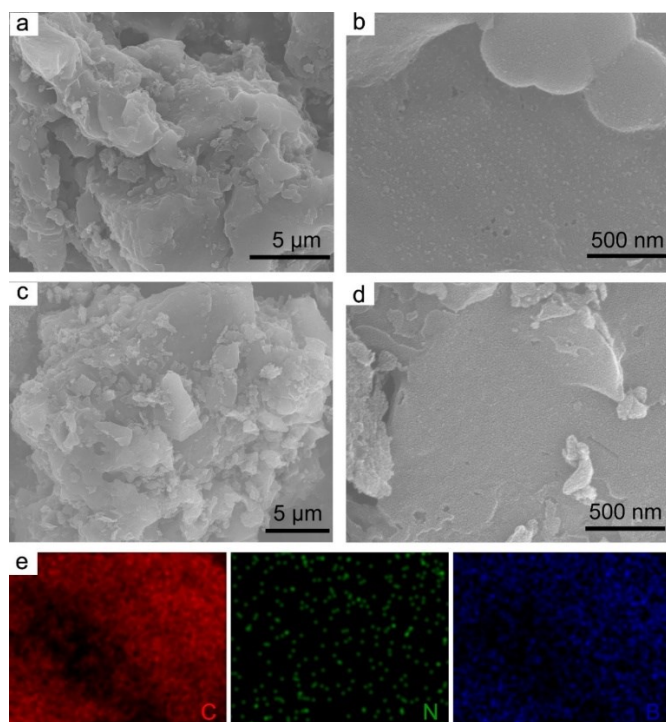

**Figure S5.** SEM micrograph of (a)(b) fresh PBSZ-AC-2 catalyst and (c)(d) used PBSZ-AC-2 catalyst; (e) elemental distribution mapping of C, N, B in fresh PBSZ-AC-2

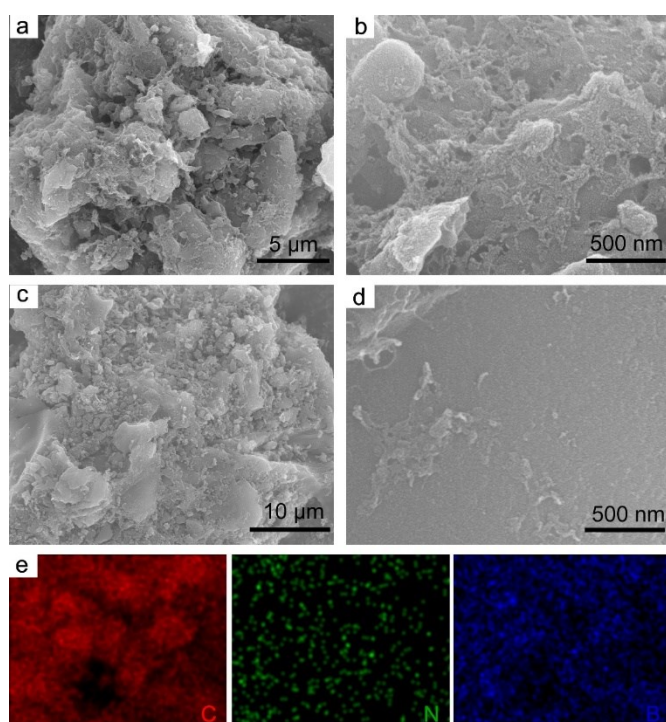

**Figure S6.** SEM micrograph of (a)(c) fresh PBSZ-AC-3 catalyst and (b)(d) used PBSZ-AC-3 catalyst; (e) elemental distribution mapping of C, N, B in fresh PBSZ-AC-3

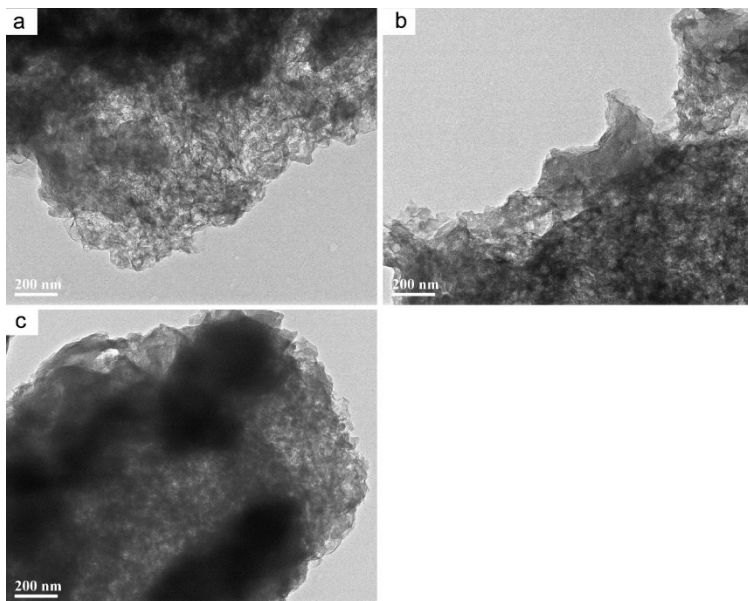

**Figure S7.** TEM images of (a) PBSZ-AC-1, (b) PBSZ-AC-2 and (c) PBSZ-AC-3 catalyst.

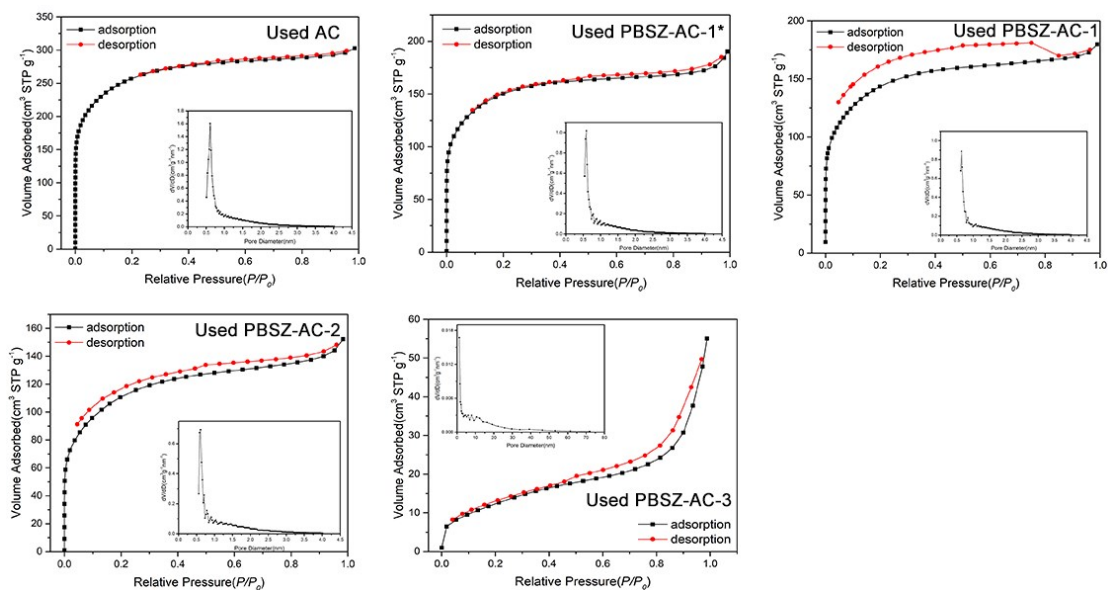

**Figure S8.**  $N_2$  sorption isotherm and pore size distributions of the used B, N-ACs

1. W. E. Davidsohn and M. C. Henry, *Chem. Rev.*, 1967, **67**, 73-106.
2. F. Gao, L. Zhang, Y. Zhou, F. Huang and L. Du, *Journal of Macromolecular Science, Part A*, 2010, **47**, 861-866.
